# Supplementary material for: Large scale synthesis of photoluminescent carbon nanodots and their application for bioimaging
Source: Royal Society of Chemistry journal article supplement (doi:10.1039/c2nr32675b), 2012-12-05
Supplement: c2nr32675b.pdf [file c2nr32675b.pdf]

## Electronic Supplementary Information

# Large scale synthesis of photoluminescent carbon nanodots and their application for bioimaging

Bisang Chen, Feiming Li\*, Wen Weng, Hongxu Guo, Xiaoyang Zhang, Yabin Chen, Tingting

Huang, Xiaolin Hong, Shiyu You, Yuemei Lin, Kunhong Zeng, Shen Chen

Department of Chemistry and Environmental Science, Zhangzhou Normal University,

Zhangzhou, 363000, P.R. China

E-mail: [lifeiming0228@gmail.com](mailto:lifeiming0228@gmail.com)

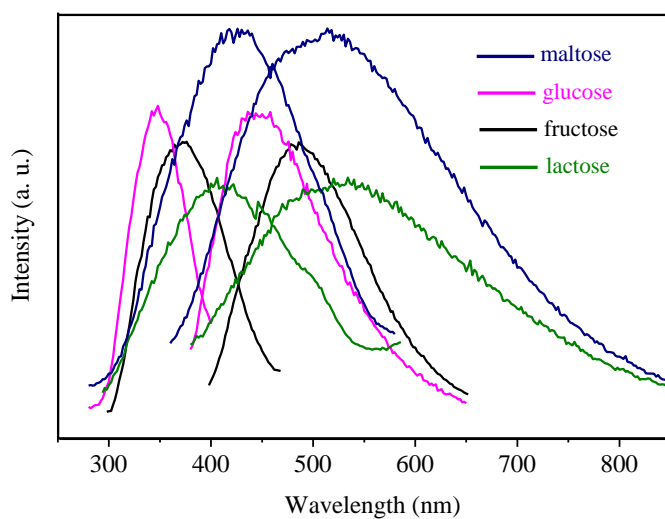

:

Fig. S1. The excitation and emission spectra of different CDs obtained by heating different sucrose analogues (glucose, maltose, maltose, and fructose) in oil acid at 215 °C for 5 min

Table S1 The maximum excitation and emission wavelength of CDs from different sucrose analogues

| Wavelength                         | Sucrose analogues |         |         |          |
|------------------------------------|-------------------|---------|---------|----------|
|                                    | glucose           | maltose | lactose | fructose |
| Maximum excitation wavelength (nm) | 345.6             | 426.9   | 404.6   | 371.6    |
| Maximum emission wavelength (nm)   | 444.7             | 512.9   | 534.1   | 485.8    |

The quantum yield ( $\Phi$ ) of CDs was measured by comparing the integrated photoluminescence intensities and the absorbency values with the reference quinine sulfate (QS). The quinine sulfate (literature  $\Phi=0.54$ ) was dissolved in 0.001 M H<sub>2</sub>SO<sub>4</sub> (refractive index ( $\eta$ ) of 1.33) and the CDs was dissolved in distilled water ( $\eta=1.33$ ).

$$\Phi = \Phi_R \times \frac{I}{I_R} \times \frac{A_R}{A} \times \frac{\eta^2}{\eta_R^2}$$

Where  $\Phi$  is the quantum yield,  $I$  is the measured integrated emission intensity,  $\eta$  is the refractive index, and  $A$  is the optical density. The subscript R refers to the reference fluorophore of known quantum yield.

Table S2 Quantum yield of CDs

| Sample          | Integrated emission intensity (I) | Abs. at 349 nm (A) | Refractive index of solvent ( $\eta$ ) | Quantum Yield ( $\Phi$ ) |
|-----------------|-----------------------------------|--------------------|----------------------------------------|--------------------------|
| Quinine sulfate | 48561.5                           | 0.055              | 1.33                                   | 0.54                     |
| CDs sample      | 16953.0                           | 0.049              | 1.33                                   | 0.216                    |
